# Supplementary material for: MUC1 in lung adenocarcinoma: cross-sectional genetic and serological study
Source: Springer Nature journal article supplement (doi:10.1186/s12885-017-3272-y), 2017-04-12

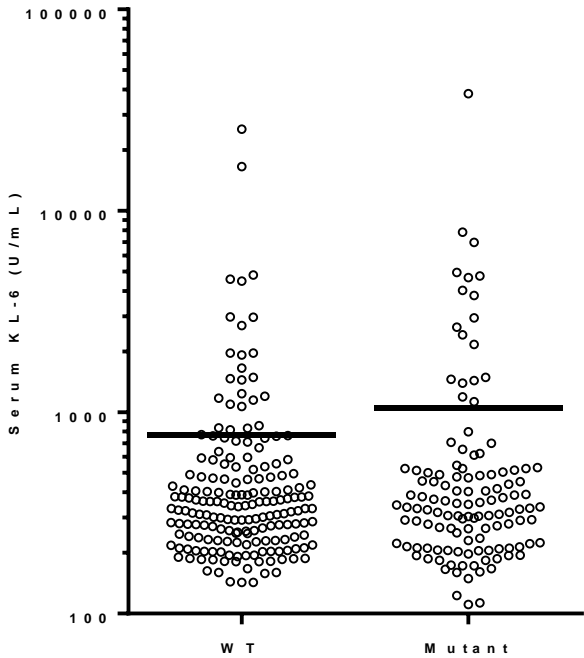

Supplement: MOESM1 [file 12220576]
